# Supplementary material for: Molecular subtypes identified by pyroptosis-related genes are associated with tumor microenvironment cell infiltration in colon cancer
Source: publisher site journal article supplement (doi:10.18632/aging.204379), 2022-11-16
Supplement: Supplementary file [file aging-v14i22-204379-supplementary-material-SD1.pdf]

## SUPPLEMENTARY FIGURE

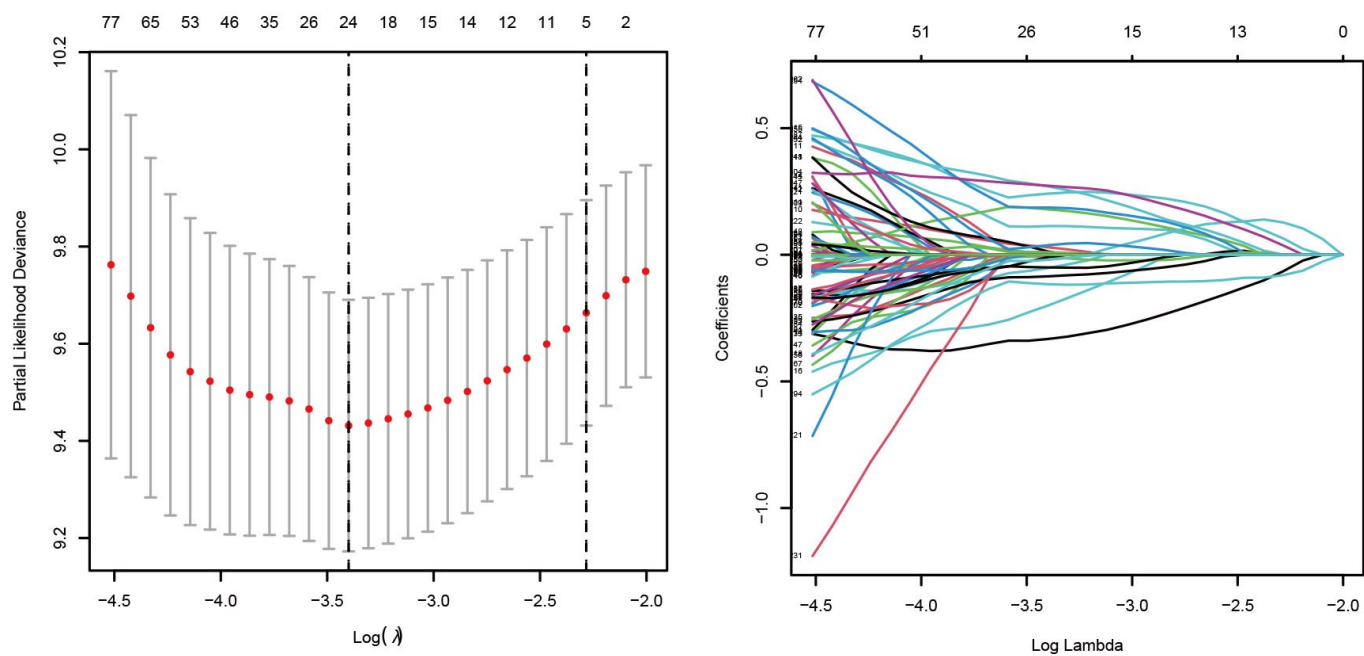

Supplementary Figure 1. Identifying signature genes in colon cancer based on the LASSO model to construct PyroSig signature.
